# Supplementary material for: Interfacial mass transfer by controlled multilayer disassembly
Source: Royal Society of Chemistry journal article supplement (doi:10.1039/c4cc00495g), 2014-01-01
Supplement: c4cc00495g1.pdf [file c4cc00495g1.pdf]

## Supporting Information

### Interfacial Mass Transfer by Controlled Multilayer Disassembly

Michael Morozov<sup>†</sup>, Leila Motiei<sup>†</sup>, Joyanta Choudhury<sup>†</sup>, Antonino Gulino<sup>‡</sup>,  
Michal Lahav, and Milko E. van der Boom<sup>\*†</sup>

<sup>†</sup>Department of Organic Chemistry, The Weizmann Institute of Science, Rehovot 76100, Israel. <sup>‡</sup>Dipartimento di Scienze Chimiche, Università di Catania, Catania 95125, Italy.  
email: milko.vanderboom@weizmann.ac.il

**Materials and Methods.** 4-Chloromethylphenyltrichlorosilane was purchased from Aldrich and used as received. Triethylphosphine was purchased from Fluka. Solvents (AR grade) were purchased from Bio-Lab (Jerusalem), Frutarom (Haifa), or Mallinckrodt Baker (Phillipsburg, NJ). Toluene was dried and purified using an M. Braun solvent purification system. ITO-coated glass slides (7 mm × 50 mm × 0.7 mm) were obtained from Delta Technologies and Single-crystal silicon(100) substrates, purchased from Wafernet (San Jose, CA) were cleaned by sonication in hexane followed by acetone, then ethanol and dried under an N<sub>2</sub> stream. Subsequently, they were cleaned for 20 min with UV and ozone in a UVOCS cleaning system (Montgomery, PA). Soda-limeglass (Chase Scientific Glass) was cleaned by immersion in a “piranha” solution (7:3 (v/v) H<sub>2</sub>SO<sub>4</sub>/30% H<sub>2</sub>O<sub>2</sub>) for 1 h. *Caution: piranha solution is an extremely dangerous oxidizing agent and should be handled with care using appropriate personal protection.* Subsequently, the substrates were rinsed with deionized (DI) water followed by the RCA (Radio Corporation of America) cleaning protocol: 1:5:1 (v/v) NH<sub>3</sub>·H<sub>2</sub>O/H<sub>2</sub>O/30% H<sub>2</sub>O<sub>2</sub> at room temperature for 45 min. The substrates were washed with ample amounts of DI water and were dried under an N<sub>2</sub> stream. All substrates were then dried in an oven for 2 h at 130°C. Complexes **1-3**, coupling layer (CL) of 4-chloromethylphenyltrichlorosilane, the template layers (TLs) and the SPMAs were prepared according to previously reported procedures.<sup>52, 53</sup> The SPMAs are prepared upon the TL of compound **1**. One deposition step is defined as the deposition of one type of metal complex (**1**, **2** or **3**) or the palladium salt. UV/vis spectroscopy was carried out using a Cary 100 spectrophotometer. Cyclic voltammetry was performed using a potentiostat (CHI660A) connected to a personal computer. All measurements were performed in a three-electrode cell configuration consisting of an ITO-modified substrate (working electrode), a Pt wire (counter electrode), and Ag/AgCl (a reference electrode). The experiments were performed at room temperature using 0.1 M solutions of TBABF<sub>4</sub> in dry acetonitrile. Angle-resolved X-ray photoelectron spectra (AR-XPS) were made at different takeoff angles with a PHI 5600 Multi Technique System (base pressure of the main chamber 2×10<sup>-10</sup> Torr). Resolution, corrections for satellite contributions,

procedures to account for steady-state charging effects, and background removal have been described elsewhere. Experimental uncertainty in binding energies lies within  $\pm 0.4$  eV.<sup>S4</sup>

**Preparation of complex 2.** Complex **2** was obtained by using the same procedure to prepare complex **3**.<sup>S3</sup> *trans*-(NH<sub>4</sub>)<sub>2</sub>OsCl<sub>6</sub> (120 mg, 0.27 mmol) and 4-(2-(pyridin-4-yl)ethyl)-1,10-phenanthroline (239 mg, 0.84 mmol) were used. Yield: 130 mg (35%). <sup>1</sup>H NMR ((CD<sub>3</sub>)<sub>2</sub>CO, 300.13 MHz):  $\delta$  (ppm) 8.6 (q,  $J = 9.0$  Hz, 6H), 8.43 (d,  $J = 1.8$  Hz, 1H), 8.40 (d,  $J = 1.8$  Hz, 1H), 8.36 (m, 3H), 8.3-8.2 (m, 3H), 8.17-8.05 (m, 3H), 7.71 (m, 4H), 7.55 (m, 3H), 7.17 (t,  $J = 5.7$  Hz, 4H), 3.79 (t,  $J = 6.9$  Hz,  $J = 5.4$  Hz, 6H), 3.14 (t,  $J = 6.9$  Hz,  $J = 5.7$  Hz, 6H). <sup>31</sup>P{<sup>1</sup>H} NMR ((CD<sub>3</sub>)<sub>2</sub>CO, 121.50 MHz):  $\delta$  (ppm) -141.4 (sept,  $J_{P-F} = 706.8$  Hz, PF<sub>6</sub>). <sup>19</sup>F{<sup>1</sup>H}NMR (CD<sub>3</sub>CN, 282.41 MHz):  $\delta$  (ppm) -73.6 (d,  $J_{P-F} = 706.8$  Hz, PF<sub>6</sub>). HRMS (ES<sup>+</sup>)  $m/z$ : calcd. for C<sub>57</sub>H<sub>45</sub>N<sub>9</sub>OsPF<sub>6</sub> [M-PF<sub>6</sub>]<sup>+</sup> 1192.3055; found 1192.3042. UV/Vis (acetonitrile):  $\lambda_{max}$ , nm ( $\epsilon$ , M<sup>-1</sup> cm<sup>-1</sup>) = 480 ( $38 \times 10^3$ ).

**Mass Transfer Experiments.** In a typical experiment, two glass substrates coated with a SPMA (16 nm-thick assemblies) were placed in a Teflon holder. Subsequently, two or four ITO-coated glass slides functionalized with a coupling layer (CL) of 4-chloromethylphenyltrichlorosilane were placed in the sample holder as well. The distance between the planes of the substrate surfaces is 0.25 to 2 cm. The set-up was transferred into a glass pressure vessel and immersed in a dry acetonitrile/toluene (1:1, v/v) solution containing PEt<sub>3</sub> (0.1 M). The vessel was sealed and heated for 72 h at 90 °C under N<sub>2</sub>. The system was allowed to attain room temperature and the slides were thoroughly washed with acetonitrile, acetone, and ethanol.

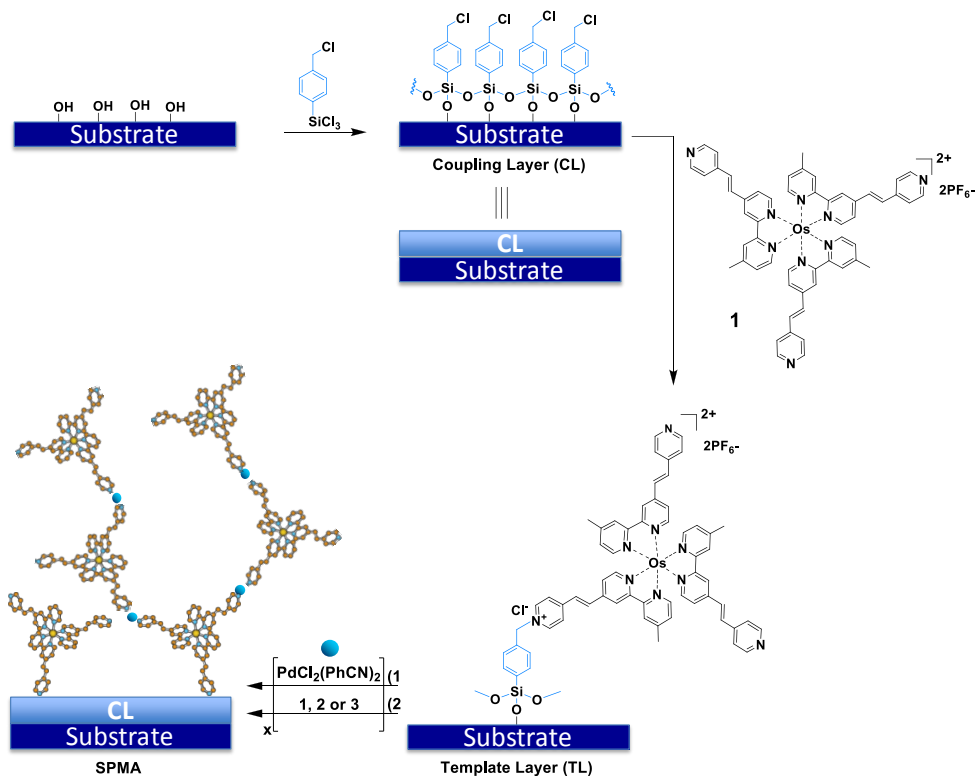

**Scheme S1.** Formation of the SPMA<sup>s</sup>:<sup>S2,S3</sup> Hydrophilic substrate surfaces are functionalized with a benzyl-chloride terminated coupling layer (**CL**) using siloxane chemistry, the **CLs** are reacted from solution at elevated temperatures with polypyridyl complex (**1**) affording template layers (**TLs**) consisting of covalently bound pyridinium salts of complex **1** that can bind metal salts, and the iterative exposure of these **TLs** to solutions of a polypyridyl complex (**1-3**) with multiple metal-binding sites and  $\text{PdCl}_2(\text{PhCN})_2$ .

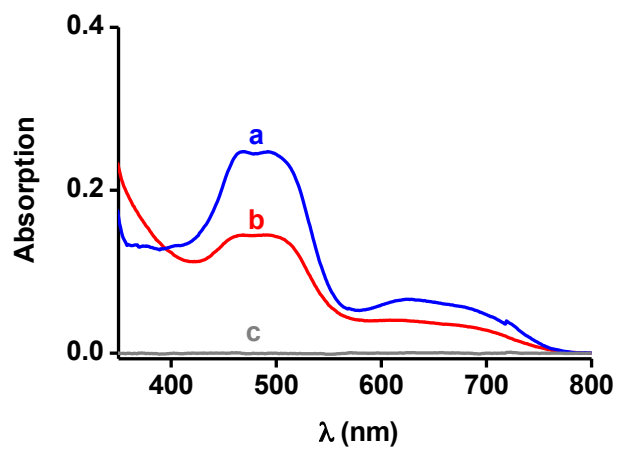

**Figure S1.** UV/vis absorption of (a) the solution phase after a mass transfer experiment with a **1**-based SPMA, and (b) a solution of complex **1** in acetonitrile/toluene (1:1, v/v). (c) baseline.

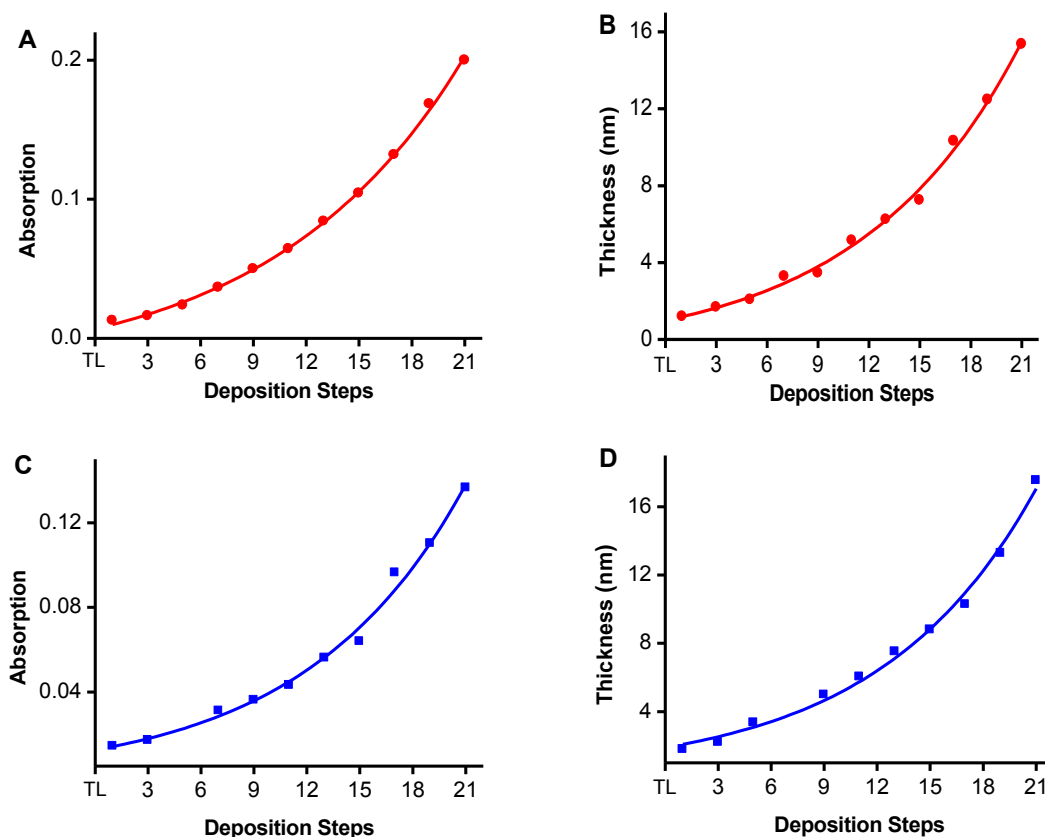

**Figure S2.** Characterization of **2**-based (red) and **3**-based (blue) SPMA. (A and C) Exponential dependence of the intensities of the MLCT bands ( $\lambda = 500$  nm) and (B and D) film thickness for compounds **2** and **3** vs the number of deposition steps, respectively. TL stands for the template layer.

**Table S1.** The cyclic voltammetry data of the template layers: I TL used for the built-up of a **1**-based SPMA, II TL after disassembly of the **1**-based SPMA with  $\text{PEt}_3$ , and III replicated TL'.

| Template layer | $E_{1/2}$ [V] | $E_{ox}$ [V] | $E_{Red}$ [V] | $I_{pa}$ [A]          | $I_{pc}$ [A]           | $\Gamma_s$ [mol cm <sup>-2</sup> ] |
|----------------|---------------|--------------|---------------|-----------------------|------------------------|------------------------------------|
| I              | 0.90          | 0.92         | 0.89          | $1.45 \times 10^{-5}$ | $-1.12 \times 10^{-5}$ | $1.2 \times 10^{-10}$              |
| II             | 0.91          | 0.94         | 0.89          | $1.48 \times 10^{-5}$ | $-1.31 \times 10^{-5}$ | $1.4 \times 10^{-10}$              |
| III            | 0.89          | 0.91         | 0.87          | $1.54 \times 10^{-5}$ | $-1.28 \times 10^{-5}$ | $1.3 \times 10^{-10}$              |

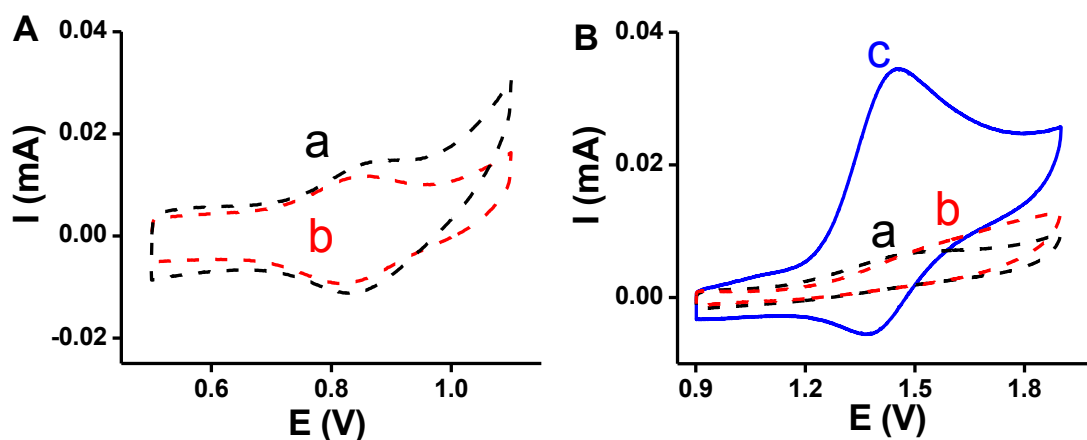

**Figure S3.** Representative cyclic voltammograms of the TLs on ITO-coated glass substrates. (a) TL formed by mass transfer upon disassembly of the osmium (**2**) and ruthenium (**3**)-based SPMAs with  $\text{PEt}_3$ , and (b) TL formed by reacting chlorobenzyl functionalized substrates with complex **2**, (c) TL formed by reacting chlorobenzyl functionalized substrates with complex **3**. All experiments were carried out at a scan rate of  $100 \text{ mVs}^{-1}$  at room temperature in  $0.1 \text{ M TBABF}_4/\text{CH}_3\text{CN}$ .

## References

- S1. D. Li, M. A. Ratner, T. J. Marks, C. Zhang, J. Yang and G. K. Wong, *J. Am. Chem. Soc.*, 1990, **112**, 7389.
- S2. L. Motiei, M. Altman, T. Gupta, F. Lupo, A. Gulino, G. Evmenenko, P. Dutta and M. E. van der Boom, *J. Am. Chem. Soc.*, 2008, **130**, 8913.
- S3. J. Choudhury, R. Kaminker, L. Motiei, G. de Ruiter, M. Morozov, F. Lupo, A. Gulino and M. E. van der Boom, *J. Am. Chem. Soc.*, 2010, **132**, 9295.
- S4. A. Gulino, *Ana.l Bioanal. Chem.*, 2013, **405**, 1479.
